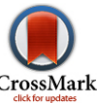

## Correction

# Correction: Genital Human Papillomavirus Infection among Women in Bangladesh: Findings from a Population-Based Survey

The *PLOS ONE* Staff

There is an error in affiliation 1 for authors Quamrun Nahar, Farhana Sultana, Anadil Alam, Mustafizur Rahman, Fatema Khatun, Nazmul Alam and Sushil Kanta Dasgupta. Affiliation 1 should be: International Centre for Diarrhoeal Disease Research, Bangladesh (icddr,b), Mohakhali, Dhaka, Bangladesh.

## Reference

1. Nahar Q, Sultana F, Alam A, Islam JY, Rahman M, et al. (2014) Genital Human Papillomavirus Infection among Women in Bangladesh: Findings from a Population-Based Survey. *PLoS ONE* 9(10): e107675. doi:10.1371/journal.pone.0107675

**Citation:** The *PLOS ONE* Staff (2014) Correction: Genital Human Papillomavirus Infection among Women in Bangladesh: Findings from a Population-Based Survey. *PLoS ONE* 9(11): e114655. doi:10.1371/journal.pone.0114655

**Published:** November 20, 2014

**Copyright:** © 2014 The *PLOS ONE* Staff. This is an open-access article distributed under the terms of the Creative Commons Attribution License, which permits unrestricted use, distribution, and reproduction in any medium, provided the original author and source are credited.
